# Supplementary material for: Simultaneous determination of four β2-agonist residues in pig feed and urine by capillary electrophoresis with field amplified sample injection and electrochemiluminescent detection
Source: Royal Society of Chemistry journal article supplement (doi:10.1039/c3ay40922h), 2013-01-01
Supplement: c3ay40922h.pdf [file c3ay40922h.pdf]

The figures which were not showed in manuscript submitted are now as the following, and they are used as supplementary explanation materials.

### 1. Effect of the electrolyte

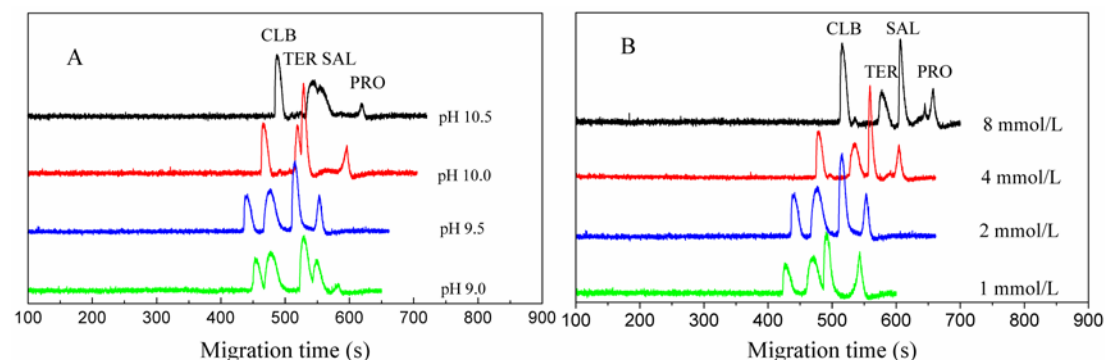

**Fig. S1.** Effects of pH (A) and concentration (B) of borate buffer on separation of four  $\beta_2$ -agonists

Conditions: detection potential 1.17 V, separation voltage 8 kV, electrokinetic injection  $8 \text{ kV} \times 6 \text{ s}$ ,

$5 \text{ mmol L}^{-1} \text{ Ru(bpy)}_3^{2+}$  with  $50 \text{ mmol L}^{-1}$  phosphate buffer at pH 8.5 in the detection cell.

### 2. Effect of separation voltage

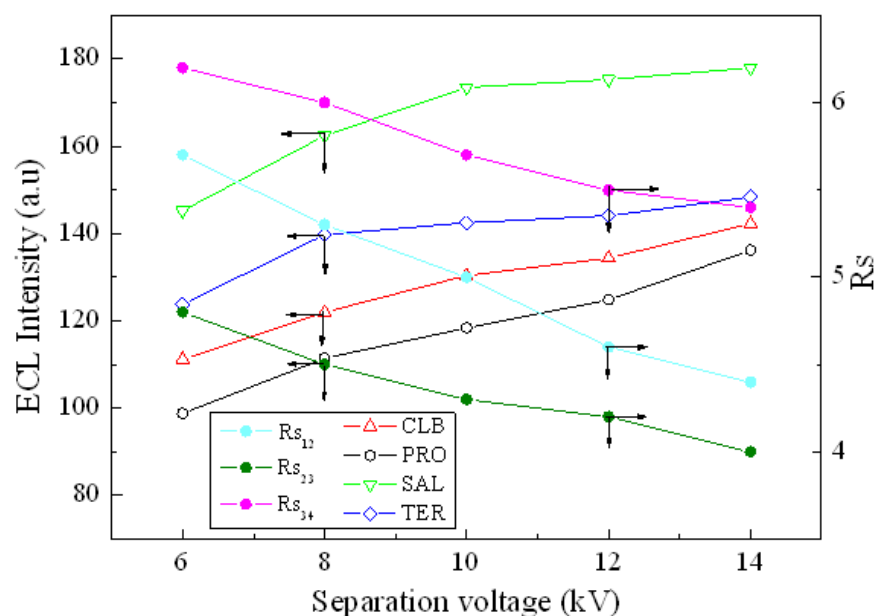

**Fig. S2.** Effect of separation voltage on ECL intensity and  $R_s$ .

Conditions: electrophoretic buffe:  $2.0 \text{ mmol L}^{-1}$  borate buffer at pH 9.5; other conditions are the

same as in the Fig. S1.  $R_{s12}$  is the  $R_s$  between CLB and TER,  $R_{s23}$  is the  $R_s$  between TER and SAL,  $R_{s34}$  is the  $R_s$  between SAL and PRO.

3 Effect of injection voltage and time

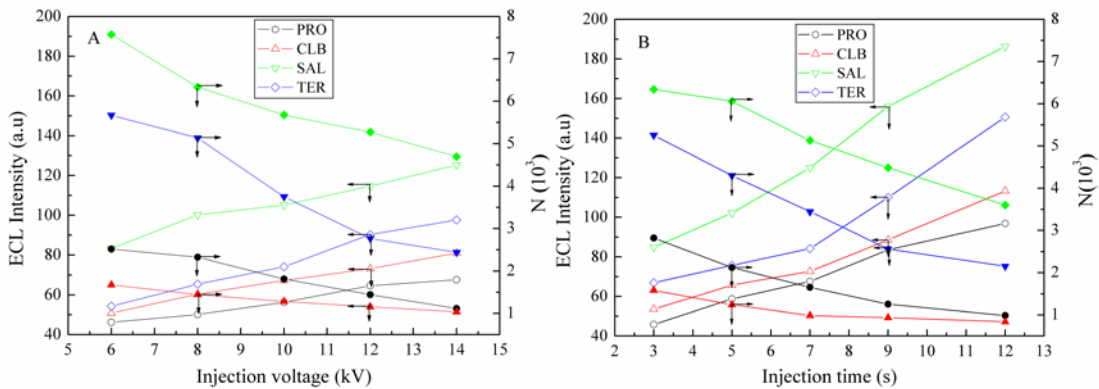

**Fig. S3.** Effects of injection voltage (A) and injection time (B) on ECL intensity and  $N$

Conditions: running buffer 2.0 mmol L<sup>-1</sup> borate at pH 9.5, separation voltage 8 kV, other conditions are the same as those in the Fig. S1.
